# Supplementary material for: Acetylation of AGO2 promotes cancer progression by increasing oncogenic miR-19b biogenesis
Source: PubMed Central journal article supplement (PMC6372475; doi:10.1038/s41388-018-0530-7), 2018-10-10
Supplement: 41388_2018_530_MOESM2_ESM.pdf [file 41388_2018_530_MOESM2_ESM.pdf]

## **SUPPLEMENTARY FIGURE LEGENDS**

### **Figure S1. AGO2 is Acetylated at K355, K493 and K720, Related to Figure 1**

(A) K355, K493 and K720 are identified as the AGO2 acetylation sites by mass spectrometry analysis. 293T cells transfected with Flag-AGO2 were treated with the deacetylase inhibitors TSA (2  $\mu$ M) and NAM (10 mM) for 6 h and 18 h before harvested, respectively. Flag-AGO2 was purified by IP with anti-Flag antibody, then subjected to 8% SDS-PAGE gel, followed by staining with Coomassie brilliant blue. The band of Flag-AGO2 were cut and digested for the mass spectrometry analysis.

(B-C) Characterization of AGO2 specific acetyl-K355, -K493 and -K720 antibodies. Specificity of AGO2 specific acetyl-antibodies were determined by dot blot assay. Nitrocellulose membrane was spotted with different amounts of acetyl-K355,-K493 and -K720 peptides or unmodified peptides, and detected with antibodies AGO2-K355-Ac, AGO2-K493-Ac and AGO2-K720-Ac, respectively.

(D) AGO2 was acetylated at K355, K493 and K720 in 293T cells. Flag-AGO2 was transfected into 293T cell, AGO2 acetylation analyzed by IP and WB by using AGO2 specific acetylation antibodies with or without the unmodified peptide.

### **Figure S2. Serum Stimulates the Expression of P300 and Ectopically Expressed P300 Associates with Endogenous AGO2, Related to Figure 2**

(A) Serum stimulates AGO2 acetylation. HeLa or A549 cell was serum-starved for 24 h and followed by stimulation with 20% serum for 1, 2, 3 h; the expression of P300 was

measured by WB.

(B) Ectopically expressed P300 associates with endogenous AGO2. 293T cell was transfected with HA-P300, after 48 h cells was lysed with RIPA buffer for IP with anti-HA antibody or normal IgG, followed by WB.

**Figure S3. AGO2 Interacts with HDAC7 Rather than Other Deacetylases, Related to Figure 3**

Flag-tagged SIRT1, SIRT5, HDAC6 or HDAC7 was individually co-transfected with Myc-AGO2 into 293T cells. Cell lysates were immunoprecipitated with anti-Myc antibody, and followed by WB with anti-Flag antibody (\* represents the non-specific band).

**Figure S4. Acetylation of AGO2 Increases miR-19b Biogenesis, Related to Figure 4**

(A) shRNA-resistant Flag-tagged AGO2-WT and AGO2-3KR were stably re-expressed in A549-shAGO2 cells, respectively. The levels of re-expressed AGO2 were detected by WB and shown comparable.

(B) 293T-shAGO2 and -shDICER stable cell lines. AGO2 and DICER were knocked down by several shRNAs in 293T cells. The protein levels were detected by WB with as indicated antibodies.

(C) The miR-19b maturation is highly sensitive to AGO2 in a DICER dependent manner. DICER or AGO2-knocked down 293T cells were transfected with pre-miR-19b1 or pre-miR-19b2 for 48 h, then total RNAs were extracted and followed by northern blotting analysis.

(D) The miR-19b maturation from pre-miR-19b1 is more sensitive to AGO2 than that from pre-miR-19b2 in a DICER dependent manner. Indicated plasmids were transfected into 293T cells for 48 h, then the total RNA were extracted and followed by northern blotting analysis.

**Figure S5. Serum stimulation induces the expression of miR-19b, but not pri-miR-19b1 and pre-miR-19b, Related to Figure 4**

A549 cell was serum-starved for 24 h and followed by stimulation with 20% serum for 1, 2, 3 h; the expression of pri-miR-19b1, pre-miR-19b and miR-19b were detected by qRT-PCR (upper panels), and the expression of P300 and AGO2 were measured by WB (lower panels).

**Figure S6. Acetylation of AGO2 does not influence its interaction with DICER, Related to Figure 5**

AGO2-WT, AGO2-K355R, AGO2-K493R, AGO2-K720R or AGO2-3KR was individually transfected into 293T cells, respectively. 48 h later, cells were lysed with RIPA buffer for IP with anti-Myc antibody, the interaction of endogenous DICER with AGO2 was performed by WB.

**Figure S7. AGO2 Acetylation Promotes Cancer Progression by miR-19b, Related to Figure 6**

(A) Validation of AGO2 expression in A549 stable cell lines. Flag-AGO2-WT, or -3KR

with or without pre-miR-19b1 were stably expressed in A549 cells, and the levels of AGO2 were detected by WB as shown comparable.

(B) AGO2 acetylation increases xenograft tumor growth *via* the miR-19b pathway.  $2.5 \times 10^6$  of above A549 stable cell lines were injected subcutaneously into the back of nude mice. At 35 days tumors were dissected and tumors sizes were shown.

(C) The expression levels of AGO2 in xenograft tumors with A549 stable cell lines. Lysates from xenograft tumors of A549 stable cell lines were determined by WB with anti-AGO2 and anti-Flag antibodies.

**Figure S8. AGO2 Acetylation Is Up-regulated and Positively Correlated with miR-19b Expression in Human Lung Cancers, Related to [Figure 7](#)**

(A) Relevance between the clinical characteristics and the expression levels of miR-19b, AGO2-K493-Ac and AGO2-K720-Ac in lung cancers. Data were analyzed using a one-way ANOVA (within Normal, Stage I, Stage II and Stage III/IV groups) and independent t-test.

(B-D) The expression levels of miR-19b1, AGO2-K493-Ac and AGO2-K720-Ac in lung cancers were significantly higher than those in normal tissues. ISH staining scores for miR-19b (B) and IHC staining scores for AGO2-K493-Ac (C) and AGO2-K720-Ac (D) in normal tissues and lung cancers were shown. Comparisons between groups for statistical significance were conducted with a 2-tailed-unpaired Student's t-test. The error bars represent mean  $\pm$  s.d., *P*-values of <0.05 (\*), <0.01 (\*\*), <0.001 (\*\*\*).

A

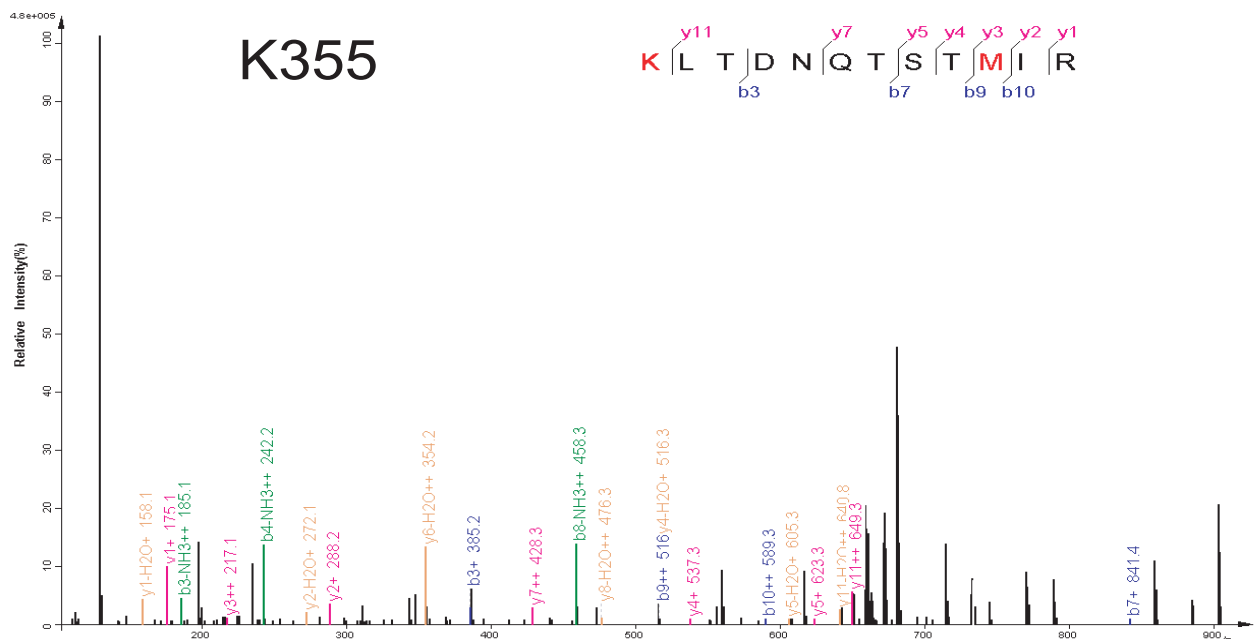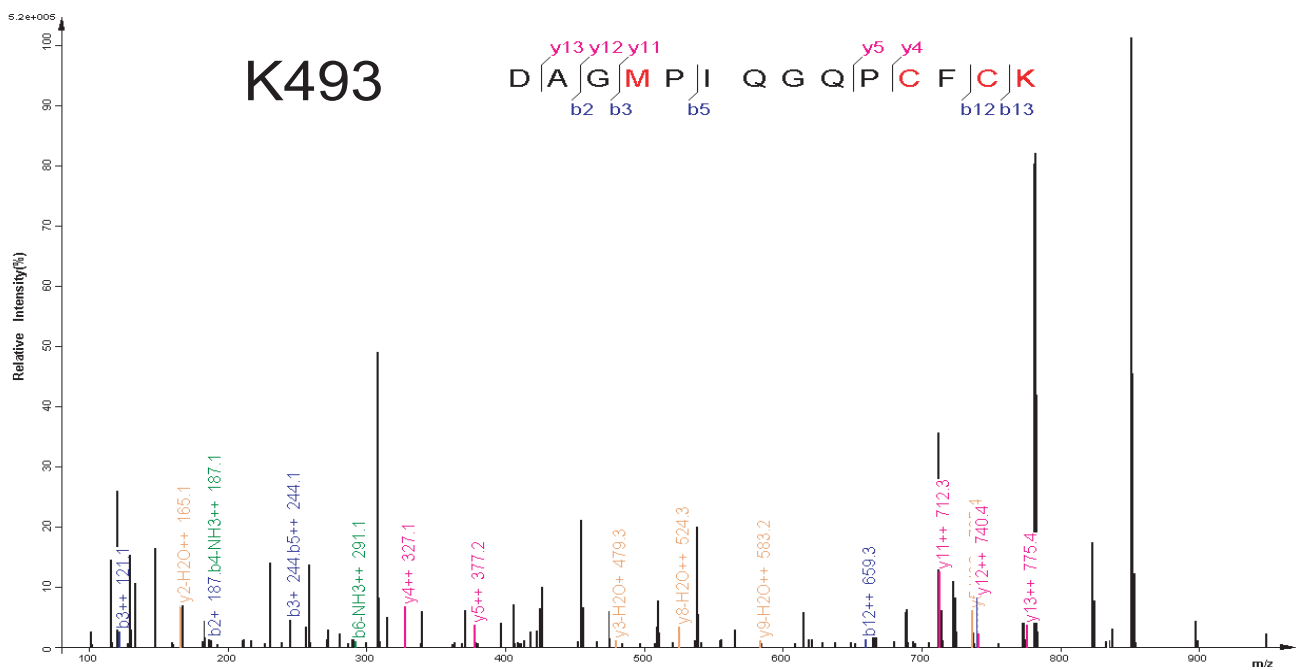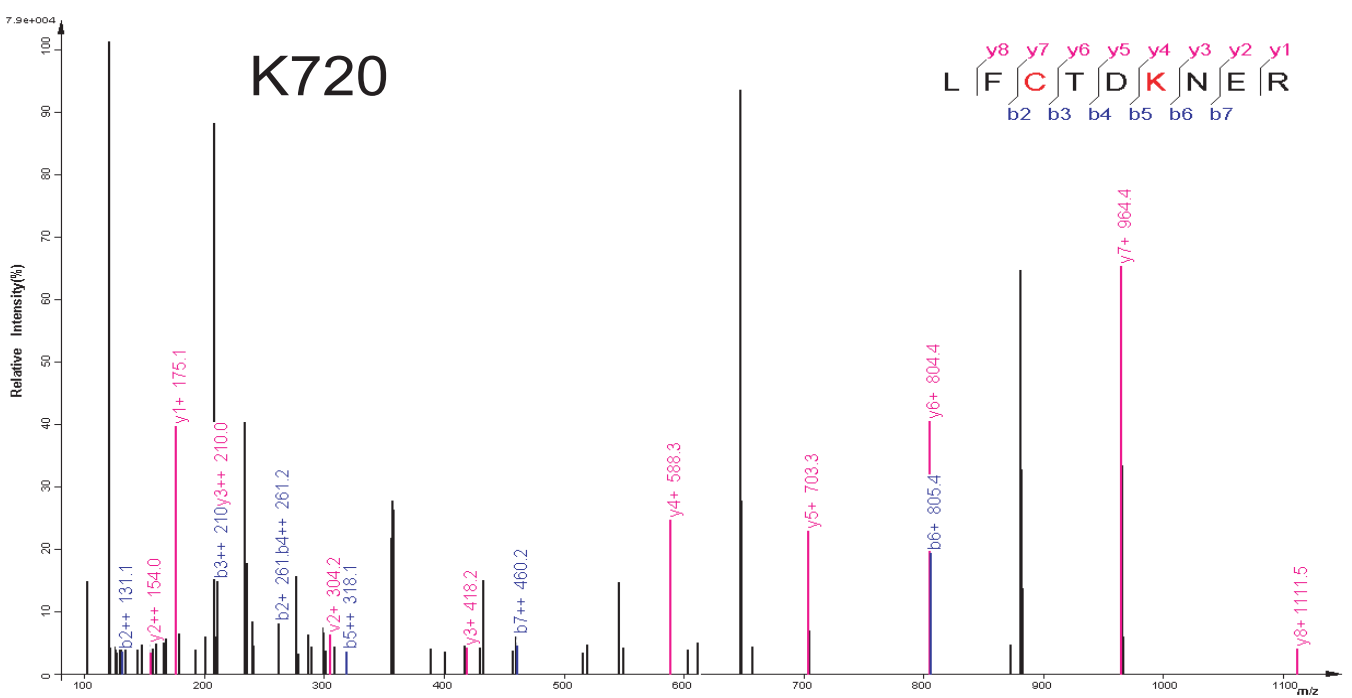

**B**

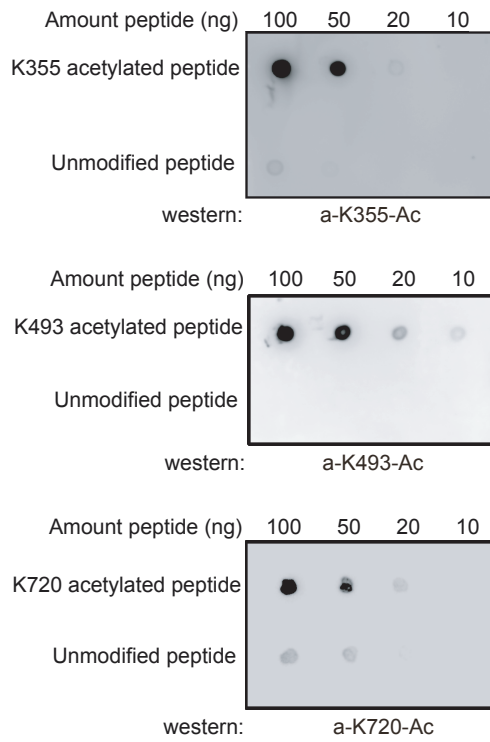

**C**

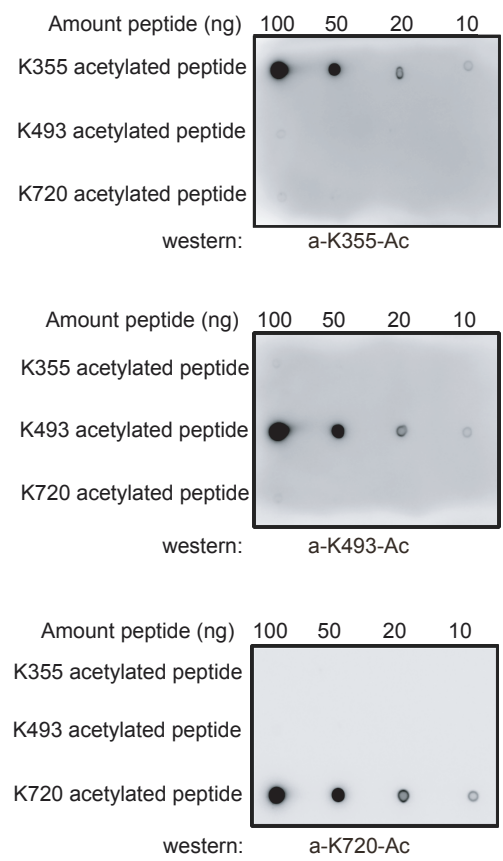

**D**

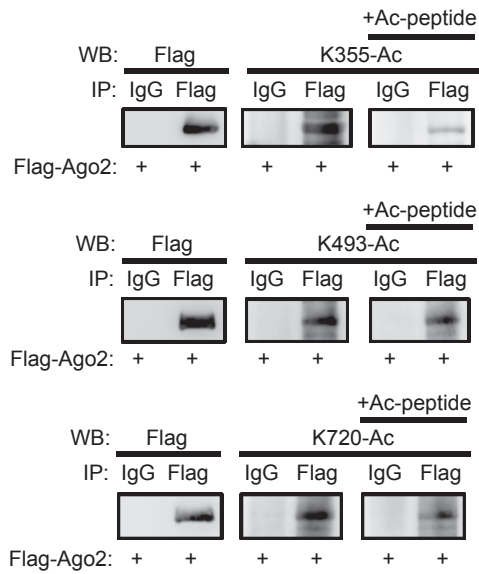

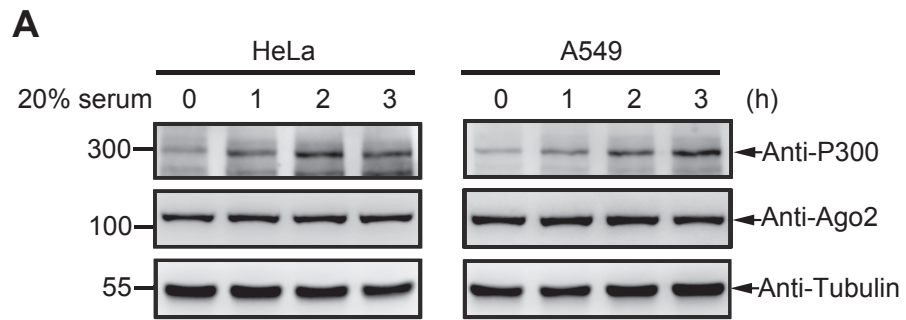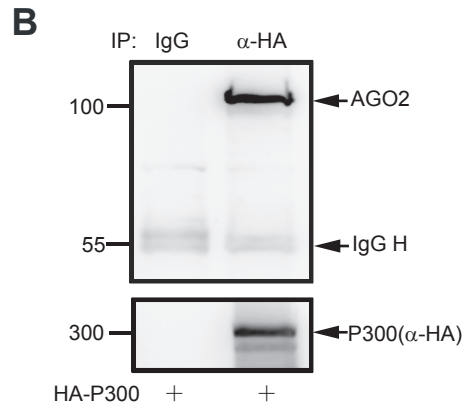

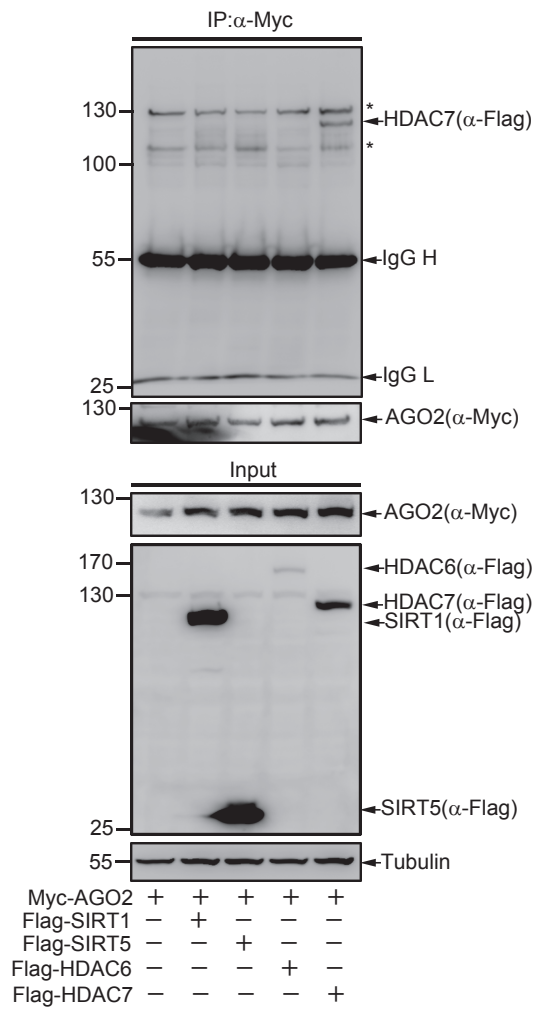



A

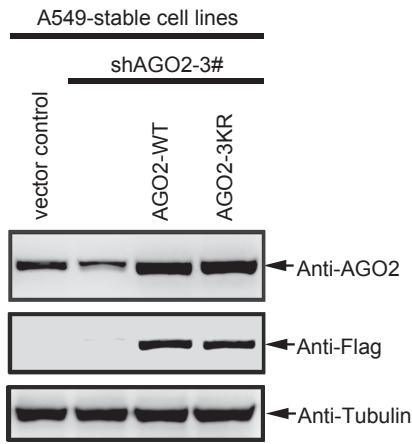

B

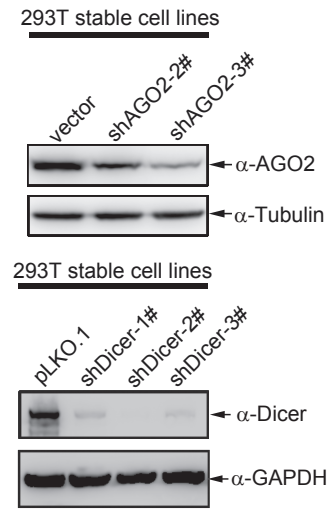

C

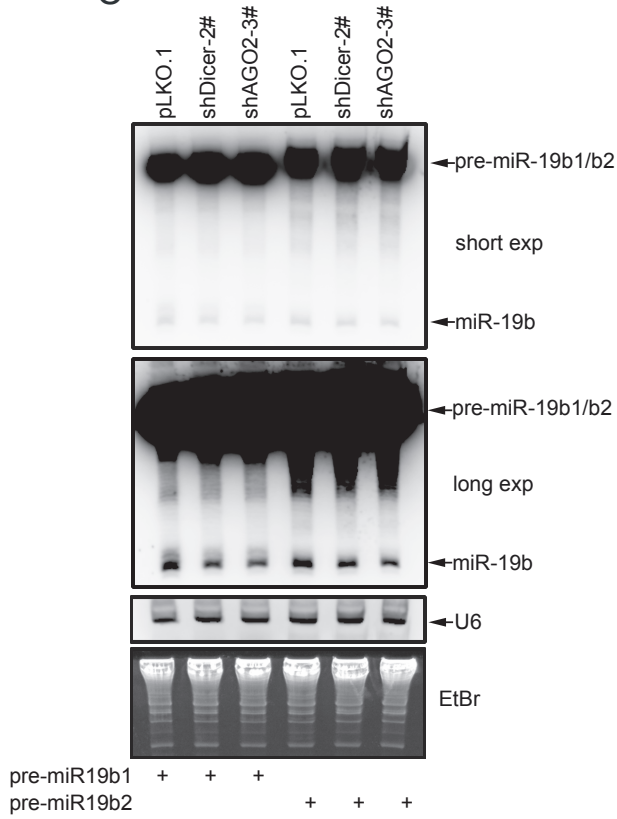

D

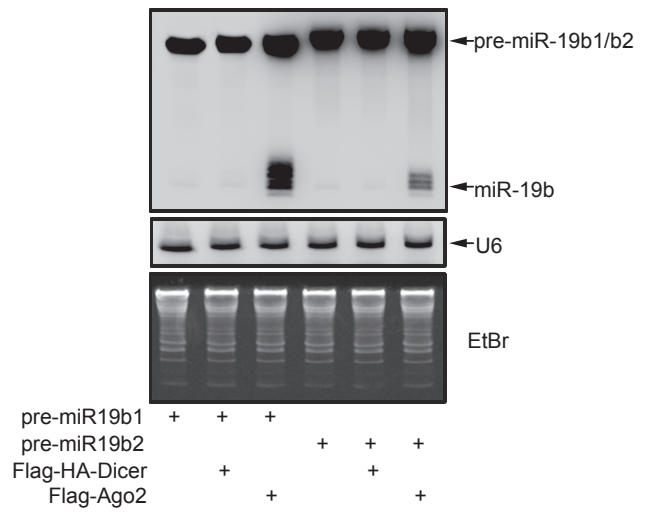

## A549 cells

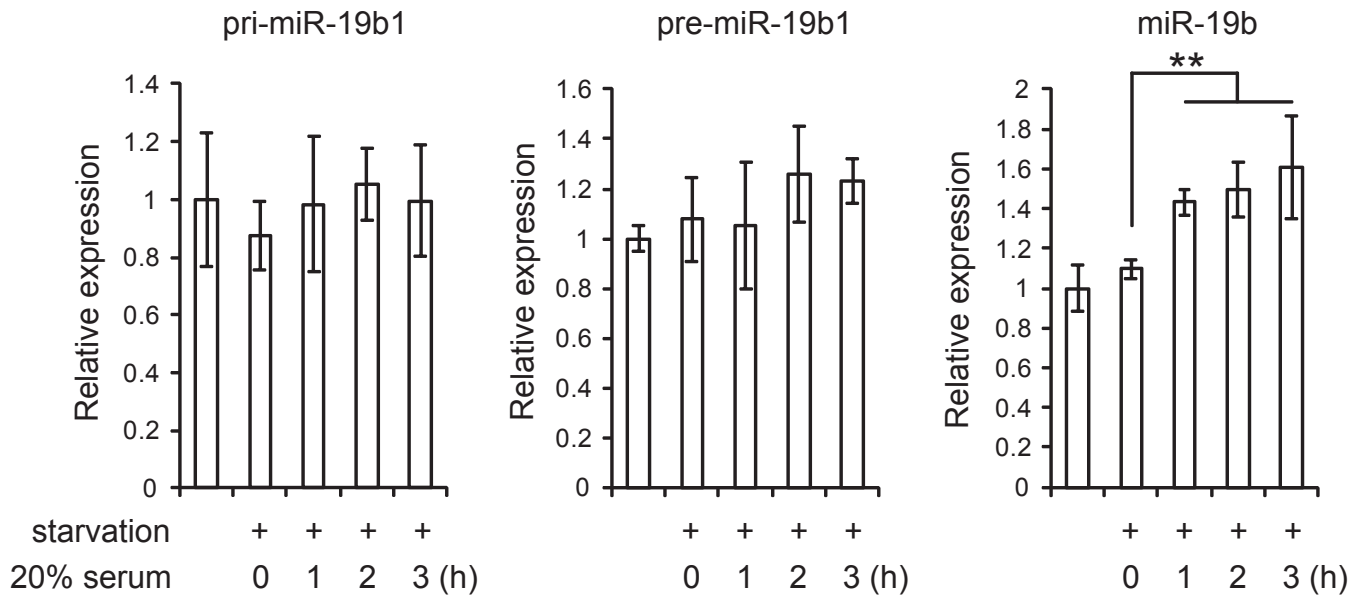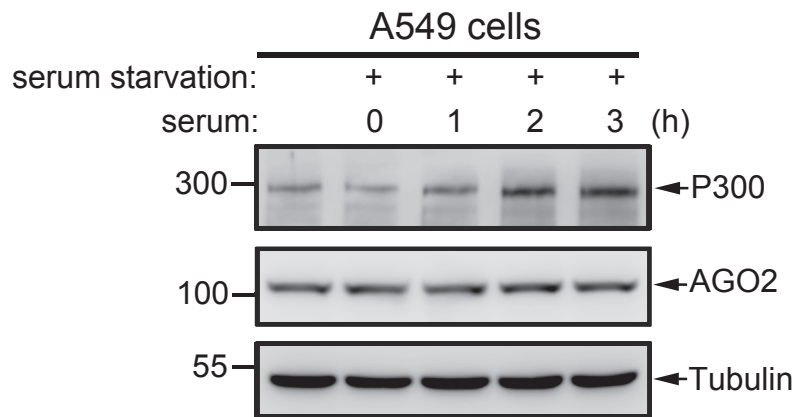

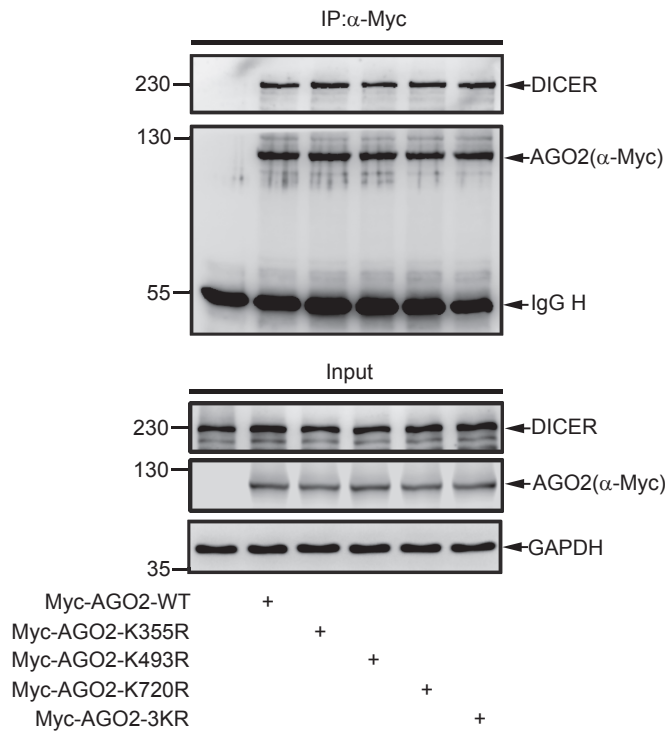

**A**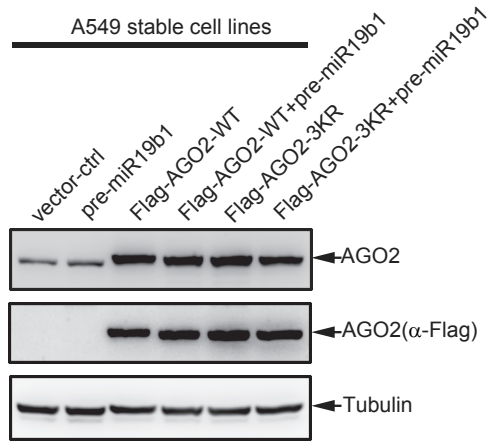**B**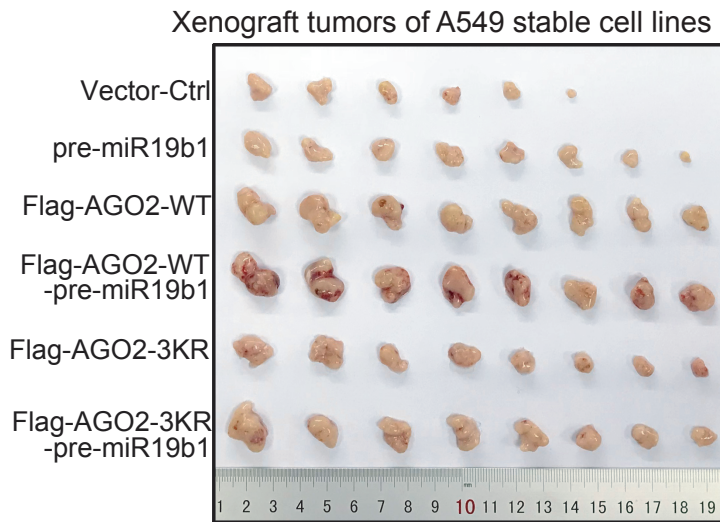**C**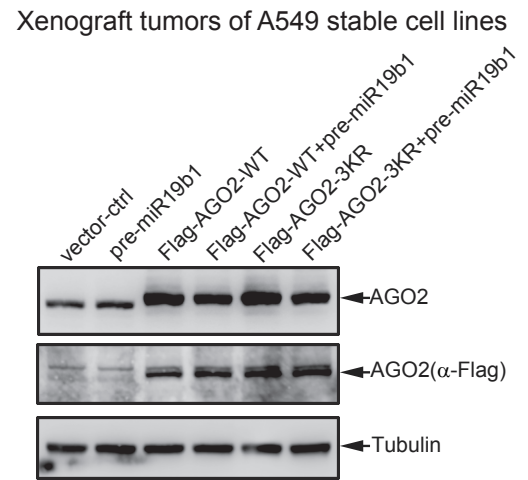

A

Relevance between the clinical characteristics and miR-19b, AGO2K493-Ac and AGO2-K720-Ac expression level of lung cancer

| Category | miR-19b |                        |          | AGO2-K493-Ac |                        |         | AGO2-K720-Ac |                        |         |
|----------|---------|------------------------|----------|--------------|------------------------|---------|--------------|------------------------|---------|
|          | N       | mean score<br>(95% CI) | P value  | N            | mean score<br>(95% CI) | P value | N            | mean score<br>(95% CI) | P value |
| Category |         |                        | < 0.0001 |              |                        | 0.0142  |              |                        | 0.001   |
| Normal   | 40      | 4.3(3.8-4.8)           |          | 40           | 4.8(4.3-5.3)           |         | 40           | 5.3(4.6-5.9)           |         |
| Cancer   | 168     | 6.4(5.9-6.9)           |          | 168          | 5.9(5.5-6.3)           |         | 168          | 6.6(6.3-7.0)           |         |
| Stage    |         |                        | 0.0011   |              |                        | 0.1082  |              |                        | 0.0097  |
| I        | 85      | 6.2(5.5-6.9)           |          | 85           | 5.9(5.3-6.5)           |         | 85           | 6.6(6.0-7.2)           |         |
| II       | 44      | 7.0(6.0-8.1)           |          | 44           | 5.9(5.1-6.8)           |         | 44           | 6.8(6.1-7.6)           |         |
| III/IV   | 39      | 6.4(5.4-7.4)           |          | 39           | 5.8(5.0-6.6)           |         | 39           | 6.6(6.0-7.3)           |         |
| Grade    |         |                        | 0.058    |              |                        | 0.1662  |              |                        | 0.7043  |
| 1        | 38      | 6.2(5.1-7.2)           |          | 38           | 6.7(5.6-7.7)           |         | 38           | 6.5(5.7-7.4)           |         |
| 2        | 66      | 6.0(5.2-6.7)           |          | 66           | 5.6(5.0-6.3)           |         | 66           | 6.3(5.8-6.8)           |         |
| 3        | 33      | 7.6(6.3-8.8)           |          | 33           | 5.8(4.9-6.7)           |         | 33           | 6.7(5.7-7.7)           |         |

B

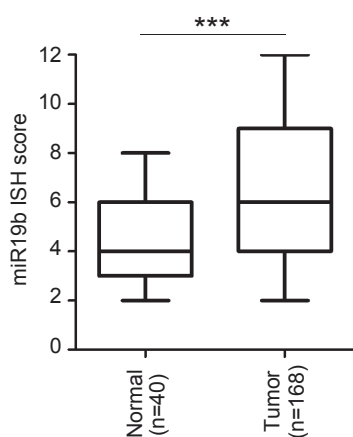

C

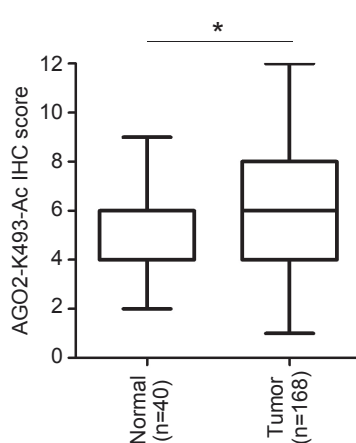

D

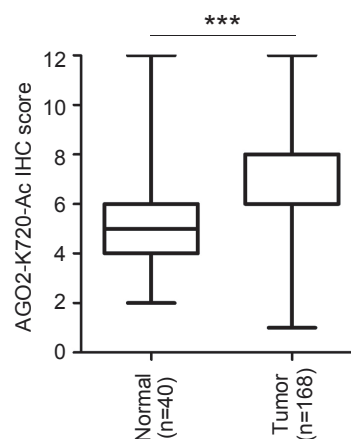

**Supplementary Table 1. Related to Figure 1. Alignment of the amino acid sequences of Ago2 homologues in various species.**

The conserved lysines of Ago2 were highlighted in red which were identified to be acetylated.

K355, K493 and K720 of Ago2 are evolutionarily conserved from *Caenorhabditis elegans* to mammals.

|                          |                   |                 |                   |
|--------------------------|-------------------|-----------------|-------------------|
| Homo sapiens             | 351RCIKKLTDNQ360  | 489PCFCYQAQA498 | 716FCTDKNERVG725  |
| Pan troglodytes          | 351RCIKKLTDNQ360  | 489PCFCYQAQA498 | 716FCTDKNERVG725  |
| Mus musculus             | 352RCIKKLTDNQ361  | 490PCFCYQAQA499 | 717FCTDKNERVG726  |
| Rattus norvegicus        | 352RCIKKLTDNQ361  | 490PCFCYQAQA499 | 717FCTDKNERVG726  |
| Oryctolagus cuniculus    | 332RCIKKLTDNQ341  | 470PCFCYQAQA479 | 697FCTDKNERVG706  |
| Bos taurus               | 352RCIKKLTDNQ361  | 490PCFCYQAQA499 | 717FCTDKNERVG726  |
| Gallus gallus            | 356RCIKKLTDNQ365  | 494PCFCYQAQA503 | 721FCTDKNERVG730  |
| Sus scrofa               | 352RCIKKLTDNQ361  | 490PCFCYQAQA499 | 717FCTDKNERVG726  |
| Anolis carolinensis      | 362RCIKKLTDNQ371  | 500PCFCYQAQA509 | 727FCTDKNERVG736  |
| Macaca mulatta           | 352RCIKKLTDNQ361  | 490PCFCYQAQA499 | 717FCTDKNERVG726  |
| Felis catus              | 348RCIKKLTDNQ357  | 486PCFCYQAQA495 | 713FCTDKNERVG722  |
| Desmodus rotundus        | 352RCIKKLTDNQ361  | 490PCFCYQAQA499 | 717FCTDKNERVG726  |
| Equus caballus           | 347RCIKKLTDNQ356  | 485PCFCYQAQA494 | 712FCTDKNERVG721  |
| Ailuropoda melanoleuca   | 350RCIKKLTDNQ359  | 488PCFCYQAQA497 | 715FCTDKNERVG724  |
| Meleagris gallopavo      | 348RCIKKLTDNQ357  | 486PCFCYQAQA495 | 713FCTDKNERVG722  |
| Ovis aries               | 346RCIKKLTDNQ355  | 484PCFCYQAQA493 | 712FCTDKNERVG721  |
| Loxodonta africana       | 345RCIKKLTDNQ354  | 483PCFCYQAQA492 | 710FCTDKNERVG719  |
| Pelodiscus sinensis      | 352RCIKKLTDNQ361  | 490PCFCYQAQA499 | 718FCTDKNERVG727  |
| Ornithorhynchus anatinus | 352RCIKKLTDNQ361  | 490PCFCYQAQA499 | 717FCTDKNERVG726  |
| Bactrocera dorsalis      | 423RCIKKLTDMQ432  | 575PCFCYATGP584 | 803FCAEKKEQSG 812 |
| Caenorhabditis elegans   | 515RCIKKLT DVQ524 | 653PCFCYAVGV662 | 880FAVDK KDQVG889 |

**Supplementary Table S2. Primer or oligonucleotide sequences were used in this study**

| The sequences of siRNA, shRNA, qRT-PCR, probe and plasmid construction |                  |                                                                  |
|------------------------------------------------------------------------|------------------|------------------------------------------------------------------|
| siRNA                                                                  |                  |                                                                  |
| Negative control                                                       |                  | ACGUGACACGUUCGGAGAATT                                            |
| si-P300                                                                |                  | AGUAAUAUCUUCGUGCCACTT                                            |
| si-HDAC7                                                               |                  | CCAGCAAACCUUCUACCAATT                                            |
| shRNA                                                                  |                  |                                                                  |
| AGO2<br>shRNA2#                                                        | Forword          | CCGGTCTATGAACTCAGGGCTTTAAACTCGAGTT<br>TAAAGCCCTGAGTTCATAGTTTTTTG |
|                                                                        | Reverse          | AATTCAAAAACTATGAACTCAGGGCTTTAAACT<br>CGAGTTTAAAGCCCTGAGTTCATAGA  |
| AGO2<br>shRNA3#                                                        | Forword          | CCGGTATCGAACATGAGACGTCATTGCTCGAGCA<br>ATGACGTCTCATGTTCGATTTTTTTG |
|                                                                        | Reverse          | AATTCAAAAAAATCGAACATGAGACGTCATTGCT<br>CGAGCAATGACGTCTCATGTTCGATA |
| DICER<br>shRNA1#                                                       | Forword          | CCGGTGCCAAGGAAATCAGCTAAATTCTCGAGAA<br>TTTAGCTGATTTCCCTGGCTTTTTG  |
|                                                                        | Reverse          | AATTCAAAAAGCCAAGGAAATCAGCTAAATTCTC<br>GAGAATTTAGCTGATTTCCCTGGCA  |
| DICER<br>shRNA2#                                                       | Forword          | CCGGTGGAAGAGGCTGACTATGAAGACTCGAGT<br>CTTCATAGTCAGCCTCTTCCTTTTTG  |
|                                                                        | Reverse          | AATTCAAAAAGGAAGAGGCTGACTATGAAGACT<br>CGAGTCTTCATAGTCAGCCTCTTCCA  |
| DICER<br>shRNA3#                                                       | Forword          | CCGGTAGCAGCTCTGGATCATAATACCTCGAGGTA<br>TTATGATCCAGAGCTGCTTTTTTTG |
|                                                                        | Reverse          | AATTCAAAAAGCAGCTCTGGATCATAATACCTC<br>GAGGTATTATGATCCAGAGCTGCTA   |
| qRT-PCR primers                                                        |                  |                                                                  |
| miR-19b                                                                | RT               | GTCGTATCCAGTGCAGGGTCCGAGGTATTGCAC<br>TGGATACGACTCAGTT            |
|                                                                        | q-PCR<br>Forword | GCCTGTGTGCAAATCCATGC                                             |
|                                                                        | q-PCR<br>Reverse | GTGCAGGGTCCGAGGT                                                 |
| pre-miR-19b                                                            | q-PCR<br>Forword | CTATGGTTAGTTTTGCAGGTTTGC                                         |

|                                                                      |                  |                                                                                         |
|----------------------------------------------------------------------|------------------|-----------------------------------------------------------------------------------------|
|                                                                      | q-PCR<br>Reverse | CAGTCAGTTTTGCATGGATTG                                                                   |
| pri-miR-19b1                                                         | q-PCR<br>Forward | ATCAAAGTGCCTGTACTG                                                                      |
|                                                                      | q-PCR<br>Reverse | TTCTACAGACTTTTCACTAC                                                                    |
| U6                                                                   | Forward          | CGCTTCGGCAGCACATATAC                                                                    |
|                                                                      | Reverse          | AGGGGCCATGCTAATCTTCT                                                                    |
| GAPDH                                                                | Forward          | CTCAAGGGCATCCTGGGCTA                                                                    |
|                                                                      | Reverse          | ATGAGGTCCACCACCCTGTT                                                                    |
| Probe sequences                                                      |                  |                                                                                         |
| miR-19b                                                              |                  | TCAGTTTTGCATGGATTGCACA                                                                  |
| U6                                                                   |                  | TGTGCTGCCGAAGCGAGCAC                                                                    |
| AGO2 mutant sequences                                                |                  |                                                                                         |
| AGO2-K355R                                                           | Forward          | CGATTAACGGACAATCAGACCTC                                                                 |
|                                                                      | Reverse          | TTTAATACATCTTTGTCCTGC                                                                   |
| AGO2-K493R                                                           | Forward          | CGATACGCGCAGGGGGCGGACAG                                                                 |
|                                                                      | Reverse          | GCAGAAGCACGGCTGGCCCTG                                                                   |
| AGO2-K720R                                                           | Forward          | GAAACGAGCGGGTTGGGAAAAG                                                                  |
|                                                                      | Reverse          | TGTCAGTGCAGAAGAGCC                                                                      |
| Sequences of pre-miR-19b1 and pre-miR-19b2 constructed in pGreenPuro |                  |                                                                                         |
| pre-miR-19b1                                                         | Forward          | GATCCGAGTTTTGCAGGTTTGCATCCAGCTGTGT<br>GATATTCTGCTGTGCAAATCCATGCAAACTGACT<br>TTTTG       |
|                                                                      | Reverse          | AATTCAAAAAGTCAGTTTTGCATGGATTTGCACA<br>GCAGAATATCACACAGCTGGATGCAAACCTGCAA<br>AACTCG      |
| pre-miR-19b2                                                         | Forward          | GATCCGAGTTTTGCAGGTTTGCATTTTCAGCGTATA<br>TATGTATATGTGGCTGTGCAAATCCATGCAAACT<br>GACTTTTTG |
|                                                                      | Reverse          | AATTCAAAAAGTCAGTTTTGCATGGATTTGCACA<br>GCCACATATACATATACGCTGAAATGCAAACCT<br>GCAAACTCG    |
| pre-miR-19b1 mutant sequences                                        |                  |                                                                                         |
| pre-miR-19b1-<br>Δug                                                 | Forward          | TGTGATATTCTGCTGTGCAAATC                                                                 |
|                                                                      | Reverse          | GCTGGATGCAAACCTGCAAAAC                                                                  |
| pre-miR-19b1-<br>Δugug                                               | Forward          | TGATATTCTGCTGTGCAAATC                                                                   |
|                                                                      | Reverse          | GCTGGATGCAAACCTGCAAAAC                                                                  |



|                                 |         |                            |
|---------------------------------|---------|----------------------------|
| pre-miR-19b1-<br><i>Δugugug</i> | Forword | ATATTCTGCTGTGCAAATCC       |
|                                 | Reverse | GCTGGATGCAAACCTGCAAAC      |
| pre-miR-19b1-u<br><i>gauug</i>  | Forword | TGATTGATATTCTGCTGTGCAAATCC |
|                                 | Reverse | GCTGGATGCAAACCTGCAAAC      |
| pre-miR-19b1-<br><i>auauug</i>  | Forword | ATATTGATATTCTGCTGTGCAAATCC |
|                                 | Reverse | GCTGGATGCAAACCTGCAAAC      |
| pre-miR-19b1-<br><i>auauau</i>  | Forword | ATATATATATTCTGCTGTGCAAATCC |
|                                 | Reverse | GCTGGATGCAAACCTGCAAAC      |
